# Supplementary material for: Feeding Grazing Dairy Cows With Different Energy Sources on Recovery of Human-Edible Nutrients in Milk and Environmental Impact
Source: Frontiers journal article supplement (doi:10.3389/fsufs.2021.642265), 2021-03-19
Supplement: Data_Sheet_1.xlsx [file Data_Sheet_1.xlsx]

## Sheet: Exp1_ N metabolism
Cow	Block	week	Corn_method	FA_Sup	N_intake	fecal_N	Urine_N	Milk_N	FecalN/Nintake	UrinaryN/Nintake	Milk N/Nintake
1629	6	6	GC	NO	430.56	189.151	96.8851	111.372	0.439314	0.225021	0.258667
1654	7	6	GC	NO	394.08	199.146	44.2215	123.931	0.505344	0.112215	0.314483
1949	1	6	GC	NO	368.16	103.202	49.7689	107.081	0.280319	0.135183	0.290853
4060	3	6	GC	NO	408	.	.	.	.	.	.
9101	2	6	GC	NO	369.6	181.489	76.4286	101.487	0.491043	0.206787	0.274586
9109	4	6	GC	NO	355.92	196.807	93.2292	112.872	0.552954	0.261939	0.317127
9112	5	6	GC	NO	515.76	179.749	49.1599	95.8181	0.348513	0.0953155	0.18578
9117	8	6	GC	NO	420	175	50	99	0.416667	0.119048	0.235714
9124	9	6	GC	NO	450.72	150	75	110	0.332801	0.1664	0.244054
9126	10	6	GC	NO	432	164.657	35.597	120.828	0.381149	0.0824004	0.279695
9130	11	6	GC	NO	508.8	166.466	96.8851	111.372	0.327174	0.190419	0.218891
1629	6	14	GC	NO	429.84	175.95	70.8345	123.931	0.409338	0.164793	0.28832
1654	7	14	GC	NO	368.16	167.176	78.4289	109.743	0.454086	0.213029	0.298086
1949	1	14	GC	NO	422.4	135.2	80	108	0.320076	0.189394	0.255682
4060	3	14	GC	NO	432.24	143.584	102.593	101.487	0.332185	0.237352	0.234793
9101	2	14	GC	NO	417.6	.	.	.	.	.	.
9109	4	14	GC	NO	409.68	148.795	53.8078	95.8181	0.363199	0.131341	0.233885
9112	5	14	GC	NO	412.8	167.176	78.4289	109.743	0.404981	0.189993	0.265851
9117	8	14	GC	NO	421.2	154.6	128.904	122.008	0.367045	0.306041	0.289667
9124	9	14	GC	NO	421.44	146.795	58.8078	95.8181	0.348318	0.13954	0.227359
9126	10	14	GC	FA	432.48	165.15	40.82	145.098	0.381866	0.0943859	0.335503
9130	11	14	GC	FA	490.32	132.334	52.211	149.452	0.269892	0.106484	0.304805
1889	7	6	GC	FA	396.96	137.815	79.8176	136.833	0.347175	0.201072	0.344703
2024	3	6	GC	FA	361.92	224.837	75.2269	104.088	0.621234	0.207855	0.287601
2044	1	6	GC	FA	410.88	234.898	32.8909	111.553	0.571695	0.0800498	0.271498
4042	6	6	GC	FA	344.64	150.987	57.8071	105.527	0.438102	0.167732	0.306195
9104	2	6	GC	FA	343.2	152.816	72.072	119.695	0.445267	0.21	0.348761
9105	4	6	GC	FA	388.8	173.82	69.9372	123.133	0.447068	0.17988	0.316699
9111	5	6	GC	FA	396.72	158.068	148.84	115.894	0.398438	0.375176	0.29213
9119	10	6	GC	FA	445.2	159.858	46.1515	110.531	0.35907	0.103665	0.248273
9120	9	6	GC	FA	420	167.176	78.4289	109.743	0.398039	0.186735	0.261294
9128	11	6	GC	FA	383.52	162.644	18.3601	145.098	0.424081	0.0478726	0.378333
1889	7	14	GC	FA	427.2	179.366	98.6553	149.452	0.419864	0.230935	0.34984
2024	3	14	GC	FA	451.68	129.485	95.418	136.833	0.286674	0.211251	0.302943
2044	1	14	GC	FA	420	.	.	.	.	.	.
4042	6	14	GC	FA	504.72	215.299	78.9037	111.553	0.426572	0.156332	0.22102
9104	2	14	GC	FA	374.64	169.43	98.9668	105.527	0.452247	0.264165	0.281676
9105	4	14	GC	FA	414.24	273.836	39.7674	119.695	0.661056	0.0960009	0.28895
9111	5	14	GC	FA	434.4	173.82	69.9372	120.152	0.400138	0.160997	0.276592
9119	10	14	GC	FA	400.8	162.723	93.0665	115.894	0.405994	0.232202	0.289156
9120	9	14	GC	FA	392.4	145.396	59.9572	110.531	0.370529	0.152796	0.28168
9128	11	14	GC	FA	453.6	170	88	105.527	0.37478	0.194004	0.232643
1895	3	6	SF	NO	374.4	164.657	35.597	120.828	0.439788	0.0950773	0.322726
1972	9	6	SF	NO	392.4	125.371	50.0331	130.411	0.319499	0.127505	0.332343
4330	1	6	SF	NO	456.96	155.106	15.7102	114.554	0.339431	0.0343798	0.250688
9102	6	6	SF	NO	317.04	122.575	30.7654	112.81	0.386624	0.0970395	0.355823
9103	2	6	SF	NO	402.72	132.733	11.3707	112.033	0.329591	0.0282348	0.278192
9106	4	6	SF	NO	442.8	165	35.597	120.828	0.372629	0.0803906	0.272874
9110	5	6	SF	NO	398.4	160	35.597	120.828	0.401606	0.0893498	0.303284
9121	7	6	SF	NO	482.16	192.468	59.0416	131.538	0.399178	0.122452	0.272811
9122	8	6	SF	NO	422.64	169.476	13.6967	121.498	0.400994	0.0324076	0.287473
9125	10	6	SF	NO	426	201.749	59.7685	119.12	0.473589	0.140302	0.279624
9129	11	6	SF	NO	444	182.252	43.4888	138.828	0.410478	0.0979478	0.312676
1895	3	14	SF	NO	460.8	247.133	61.6816	116.928	0.536313	0.133858	0.253751
1972	9	14	SF	NO	391.68	161.002	66.1342	130.411	0.411055	0.168848	0.332954
4330	1	14	SF	NO	422.64	160.86	39.6282	114.554	0.380607	0.0937634	0.271045
9102	6	14	SF	NO	397.2	158.603	46.0993	112.81	0.399303	0.116061	0.284013
9103	2	14	SF	NO	359.52	122.457	9.41283	112.033	0.340611	0.0261817	0.311619
9106	4	14	SF	NO	436.8	.	.	.	.	.	.
9110	5	14	SF	NO	465.6	148.482	17.1215	132.397	0.318905	0.0367729	0.284357
9121	7	14	SF	NO	408.72	180.496	17.1513	131.538	0.441613	0.0419634	0.32183
9122	8	14	SF	NO	414.48	166.185	25.5357	121.498	0.400948	0.061609	0.293133
9125	10	14	SF	NO	466.32	189.809	46.4005	119.12	0.407036	0.0995035	0.255446
9129	11	14	SF	NO	447.6	168.657	35.797	130.828	0.376802	0.0799753	0.292289
1905	6	6	SF	FA	421.68	125.655	143.853	157.338	0.297986	0.341142	0.373123
1961	1	6	SF	FA	304.8	172.869	48.6187	147.748	0.567156	0.15951	0.484739
2040	3	6	SF	FA	500.16	215.411	47.4214	160.724	0.430685	0.0948125	0.321345
2071	10	6	SF	FA	481.68	251.333	76.992	106.004	0.521785	0.15984	0.220072
9107	2	6	SF	FA	498.48	306.294	26.1062	114.783	0.614456	0.0523715	0.230266
9108	4	6	SF	FA	382.8	143.321	21.6255	139.861	0.374402	0.056493	0.365364
9113	5	6	SF	FA	365.52	131.019	10.3738	138.496	0.358446	0.0283808	0.378902
9114	8	6	SF	FA	406.8	159.223	10.0399	127.576	0.391404	0.0246801	0.31361
9115	9	6	SF	FA	436.32	164.266	46.9727	141.696	0.376481	0.107656	0.324753
9118	7	6	SF	FA	364.8	182.252	43.4888	138.828	0.499595	0.119213	0.380559
9127	11	6	SF	FA	328.8	173.82	69.9372	123.133	0.52865	0.212704	0.374491
1905	6	14	SF	FA	393.12	170.592	80.0732	157.338	0.433944	0.203686	0.40023
1961	1	14	SF	FA	352.08	168.577	15.2129	147.349	0.478802	0.0432085	0.41851
2040	3	14	SF	FA	422.16	198.527	52.0191	160.724	0.470264	0.123221	0.380718
2071	10	14	SF	FA	480	.	.	.	.	.	.
9107	2	14	SF	FA	544.8	162.029	41.5464	114.783	0.29741	0.0762598	0.210688
9108	4	14	SF	FA	361.44	181.913	57.0681	139.861	0.5033	0.157891	0.386955
9113	5	14	SF	FA	369.6	264.065	26.7323	138.496	0.714463	0.0723277	0.37472
9114	8	14	SF	FA	336.96	129.389	14.4214	127.576	0.383989	0.0427986	0.37861
9115	9	14	SF	FA	342.24	142.801	38.8708	141.696	0.417253	0.113577	0.414026
9118	7	14	SF	FA	389.28	193.256	24.8518	136.85	0.496446	0.0638405	0.351547
9127	11	14	SF	FA	345.6	162.252	45.4888	136.828	0.46948	0.131623	0.395914

## Sheet: Exp 1_ Plasma AA
Cow	Block	Corn_method	FA_Sup	Time	Asp	Glu	Ser	Gly	His	Arg	Thr	Ala	Pro	Tyr	Val	Met	Cys	Ile	Leu	Phe	Lys	EAA	NEAA	BCAA	Total
1629	6	GC	FA	1	15.46	42.38	67.43	43.33	38.17	106.68	54.61	165.42	52.48	20.52	214.62	15.9	25.9	116.83	127.82	43.91	52.83	771.38	432.93	459.27	1204.31
1629	6	GC	FA	2	21.78	49.08	79.26	47.32	35.52	118.1	63.75	167.62	60.66	22.98	217.05	16.49	29.33	117.74	129.49	45.21	55.62	798.97	478.04	464.28	1277.01
1629	6	GC	FA	3	17.48	44.52	70.84	44.08	36.55	111.23	57.54	166.12	54.42	20.87	215.39	16.09	26.35	117.12	128.65	44.32	54.78	781.67	444.67	461.16	1226.34
1889	7	GC	NO	1	21.87	49.19	79.36	47.38	33.19	118.25	63.83	167.68	60.74	23.01	217.11	16.51	29.37	117.76	129.55	45.24	55.76	797.21	478.59	464.42	1275.8
1889	7	GC	NO	2	17.57	44.62	72.06	44.13	36.6	111.37	57.61	166.17	54.49	20.9	215.45	16.1	26.38	117.14	128.71	44.35	53.31	780.66	446.32	461.3	1226.98
1889	7	GC	NO	3	17.57	44.62	72.06	44.13	36.6	111.37	57.61	166.17	54.49	20.9	215.45	16.1	27.36	117.14	128.71	44.35	54.93	782.27	447.3	461.3	1229.58
1895	3	SF	FA	1	35.24	65.14	92.53	56.92	42.72	138.68	74.21	176.27	70.4	26.83	226.6	18.83	35.28	121.34	139.53	50.33	81.09	893.31	558.61	487.46	1451.93
1895	3	SF	FA	2	35.45	65.4	94.17	57.06	42.83	142.42	75.64	176.4	71.87	26.9	226.74	18.86	35.37	121.39	139.68	50.4	81.45	899.42	562.62	487.81	1462.04
1895	3	SF	FA	3	29.74	59.26	82.14	52.78	46.5	129.95	66.53	174.24	63.94	24.99	224.36	18.28	31.55	120.5	138.26	49.13	77.45	870.96	518.66	483.11	1389.62
1949	1	GC	FA	1	19.79	47	75.77	46.6	34.98	113.55	60.77	166.98	57.65	21.97	216.34	16.32	28.89	117.47	128.74	44.83	55.52	788.52	464.64	462.56	1253.17
1949	1	GC	FA	2	21.87	49.19	79.36	47.38	33.19	118.25	63.83	167.68	60.74	23.01	217.11	16.51	29.37	117.76	129.55	45.24	55.76	797.21	478.59	464.42	1275.8
1949	1	GC	FA	3	17.21	43.41	70.57	43.9	36.41	110.79	56.33	165.96	54.2	20.79	215.22	16.05	26.24	117.05	128.46	44.23	54.33	778.85	442.29	460.72	1221.14
1972	9	SF	FA	1	34.91	64.76	92.18	56.7	42.56	138.15	73.93	176.07	70.13	26.73	226.38	18.77	33.94	121.26	139.3	50.21	80.55	891.1	555.42	486.94	1446.52
1972	9	SF	FA	2	37.11	67.04	96.19	57.42	43.1	143.33	77.37	176.72	72.32	27.07	227.1	18.95	35.6	121.53	140.06	50.6	80.31	902.34	569.49	488.69	1471.83
1972	9	SF	FA	3	21.03	47.74	62.85	44.85	50.07	112.98	53.27	168.61	49.51	20.01	218.64	17.15	24.6	119.74	136.27	45.87	71.1	825.1	439.2	474.66	1264.3
2024	3	GC	NO	1	21.51	48.77	77.8	47.14	35.38	117.66	63.51	167.46	59.37	22.22	216.87	16.45	29.22	117.67	129.3	45.12	55.18	797.15	473.49	463.85	1270.64
2024	3	GC	NO	2	9.93	36.53	59.03	39.84	40.69	99.18	47.43	163.55	45.24	18.34	211.61	15.4	21.95	116.89	127.29	42.13	50.63	751.24	394.41	455.79	1145.65
2024	3	GC	NO	3	13.65	40.47	65.36	41.17	37.62	105.12	51.9	164.83	49.73	19.59	213	15.74	24.58	116.58	128	43.56	52.75	764.27	419.38	457.57	1183.64
2040	3	SF	NO	1	35.82	65.83	94.58	57.31	43.01	143.03	74.72	176.62	70.89	27.02	226.98	18.92	35.52	121.49	139.93	50.53	82.05	900.68	563.57	488.4	1464.25
2040	3	SF	NO	2	35.71	65.7	93.05	57.23	42.96	139.45	75.87	176.55	70.8	26.98	226.91	18.9	35.48	121.46	139.86	50.49	81.87	897.77	561.5	488.23	1459.27
2040	3	SF	NO	3	29.76	58.32	82.16	52.8	46.51	129.98	66.54	174.25	62.72	24.22	224.37	18.28	30.39	120.5	139.35	49.13	77.48	872.16	514.63	484.22	1386.79
2044	1	GC	NO	1	21.69	48.98	79.16	47.26	35.47	117.95	63.67	167.57	59.52	22.96	216.99	16.48	29.3	117.72	129.43	45.18	55.47	798.37	476.43	464.14	1274.79
2044	1	GC	NO	2	21.78	49.08	79.26	47.32	35.52	118.1	63.75	167.62	60.66	22.98	217.05	16.49	29.33	117.74	129.49	45.21	55.62	798.97	478.04	464.28	1277.01
2044	1	GC	NO	3	18.18	45.35	73.86	44.54	36.93	112.39	59.14	166.55	56.02	21.75	215.87	16.21	27.61	117.29	129.15	44.58	54.34	785.9	453.85	462.32	1239.75
2071	10	SF	NO	1	32.76	62.53	88.27	54.06	44.83	136.43	70.58	175.44	66.74	25.6	225.68	18.6	32.32	120.99	139.67	49.83	78.8	885.41	537.73	486.34	1423.14
2071	10	SF	NO	2	35.82	65.83	94.58	57.31	43.01	143.03	75.97	176.62	72.17	27.02	226.98	18.92	35.52	121.49	139.93	50.53	82.05	901.92	564.86	488.4	1466.78
2071	10	SF	NO	3	29.02	57.45	80.06	52.3	46.08	128.77	64.75	173.79	60.92	23.99	222.67	18.16	30.11	120.31	138.79	48.86	78.12	866.51	507.64	481.77	1374.15
4330	1	SF	FA	1	32.41	62.12	87.9	53.83	44.64	135.85	70.28	175.22	67.72	25.49	225.44	18.54	33.37	120.91	139.41	49.71	78.21	882.99	538.07	485.76	1421.06
4330	1	SF	FA	2	37.44	67.43	96.55	57.64	40.38	143.87	77.66	176.92	73.89	28	227.32	19	35.73	121.61	140.29	50.71	80.84	901.69	573.61	489.21	1475.3
4330	1	SF	FA	3	.	.	.	.	.	.	.	.	.	.	.	.	.	.	.	.	.	.	.	.	.
9104	2	GC	NO	1	20.15	47.41	77.31	46.84	35.16	116.91	62.09	167.19	59	22.08	216.58	16.38	29.04	117.56	128.99	44.96	56.11	794.75	469.02	463.13	1263.77
9104	2	GC	NO	2	21.24	47.62	77.5	46.96	35.25	117.21	62.25	167.3	59.15	22.14	216.7	16.41	29.11	117.61	129.11	45.02	56.41	795.96	471.02	463.42	1266.99
9104	2	GC	NO	3	20.15	47.41	77.31	46.84	35.16	116.91	62.09	167.19	59	22.08	216.58	16.38	29.04	117.56	128.99	44.96	56.11	794.75	469.02	463.13	1263.77
9107	2	SF	NO	1	35.82	65.83	93.17	57.31	43.01	143.03	75.97	176.62	70.89	27.02	226.98	18.92	35.52	121.49	139.93	50.53	82.05	901.92	562.16	488.4	1464.08
9107	2	SF	NO	2	34.95	64.8	90.82	56.72	42.57	138.21	73.96	176.09	68.89	26.74	226.4	18.78	33.95	121.27	139.32	50.22	80.61	891.34	552.96	486.99	1444.31
9107	2	SF	NO	3	26.49	54.77	74.63	49.49	47.87	123.18	61.22	172.88	58.57	22.78	221.68	17.91	28.4	119.93	138.74	47.49	75.52	853.52	488.01	480.34	1341.53
9109	4	GC	FA	1	19.61	46.79	75.57	46.48	34.89	113.26	60.61	166.87	57.5	21.92	216.22	16.29	27.82	117.43	128.62	44.77	55.23	787.32	462.57	462.27	1249.88
9109	4	GC	FA	2	19.61	46.79	75.57	46.48	34.89	113.26	60.61	166.87	57.5	21.92	216.22	16.29	27.82	117.43	128.62	44.77	55.23	787.32	462.57	462.27	1249.88
9109	4	GC	FA	3	19.88	47.1	75.86	46.66	35.02	113.69	60.84	167.03	57.72	22	216.4	16.34	28.93	117.5	128.8	44.86	55.67	789.13	465.19	462.7	1254.32
9111	5	GC	NO	1	19.35	46.47	74.14	46.31	34.76	112.82	59.37	166.71	56.24	21.83	216.04	16.25	27.72	117.36	128.43	44.67	54.79	784.49	458.76	461.84	1243.25
9111	5	GC	NO	2	21.51	48.77	78.96	47.14	35.38	117.66	63.51	167.46	59.37	22.22	216.87	16.45	29.22	117.67	129.3	45.12	55.18	797.15	474.65	463.85	1271.8
9111	5	GC	NO	3	17.65	44.72	72.16	44.19	36.64	111.52	57.69	166.23	54.56	20.93	215.51	16.12	26.42	117.16	128.77	44.39	55.08	782.88	446.85	461.45	1229.74
9112	5	GC	FA	1	19.52	46.68	75.48	46.43	34.85	113.11	60.53	166.82	57.43	21.89	216.16	16.28	27.79	117.41	128.55	44.74	55.08	786.71	462.02	462.12	1248.73
9112	5	GC	FA	2	15.29	41.39	67.25	43.22	38.07	106.39	54.47	165.32	51.34	19.82	214.51	15.87	24.88	116.78	128.58	43.85	52.53	771.06	428.5	459.87	1199.55
9112	5	GC	FA	3	8.93	34.59	55.97	37.73	40.01	97.53	44.81	161.68	43.53	17.43	210.91	15.22	21.59	116.61	127.33	41.76	48.78	742.96	381.46	454.85	1124.42
9113	5	SF	NO	1	35.49	65.44	92.81	57.09	42.85	139.09	74.44	176.42	70.62	26.91	226.77	18.87	34.17	121.4	139.71	50.42	81.51	895.05	558.95	487.88	1454
9113	5	SF	NO	2	35.27	65.18	92.57	56.94	42.74	138.74	74.24	176.29	70.43	26.85	226.62	18.83	34.08	121.35	139.55	50.34	81.15	893.57	557.62	487.52	1451.19
9113	5	SF	NO	3	32.44	62.15	86.55	53.85	44.65	135.9	70.3	175.24	66.48	25.5	225.46	18.55	32.19	120.91	139.43	49.72	80.23	885.16	534.41	485.81	1419.57
9118	7	SF	NO	1	35.82	65.83	93.17	57.31	43.01	143.03	74.72	176.62	70.89	27.02	226.98	18.92	35.52	121.49	139.93	50.53	82.05	900.68	562.16	488.4	1462.84
9118	7	SF	NO	2	33.52	63.42	90.47	54.56	45.24	137.67	72.45	175.9	68.62	26.64	226.19	18.73	33.82	121.19	140.21	50.11	80.07	891.84	546.94	487.58	1438.78
9118	7	SF	NO	3	30.08	59.66	82.49	53.01	46.7	130.5	66.81	174.45	64.21	25.1	224.59	18.34	31.69	120.58	139.59	49.25	78.03	874.39	520.68	484.76	1395.08
9121	7	SF	FA	1	35.13	65.01	92.41	56.84	42.67	138.5	74.12	176.2	70.31	26.8	226.52	18.81	35.24	121.31	139.45	50.29	80.91	892.58	557.95	487.29	1450.53
9121	7	SF	FA	2	37.66	67.69	96.79	57.79	40.48	144.23	77.86	177.05	74.08	28.07	227.46	19.04	35.82	121.67	140.44	50.79	81.2	903.16	574.95	489.56	1478.12
9121	7	SF	FA	3	30.27	59.89	84.05	53.13	46.81	130.81	68.17	174.57	64.36	25.16	224.72	18.37	31.76	120.63	138.64	49.32	78.36	875.84	523.19	484	1399.03
9122	5	GC	FA	1	17.48	44.52	70.84	44.08	36.55	111.23	57.54	166.12	54.42	20.87	215.39	16.09	26.35	117.12	128.65	44.32	54.78	781.67	444.67	461.16	1226.34
9122	5	GC	FA	2	19.97	47.2	75.96	46.72	35.07	116.62	60.92	167.09	57.79	22.03	216.46	16.35	28.96	117.52	128.87	44.89	55.82	792.51	465.73	462.84	1258.24
9122	5	GC	FA	3	19.44	46.58	74.24	46.37	34.8	112.97	59.45	166.76	57.35	21.86	216.1	16.26	27.75	117.38	128.49	44.7	54.93	785.1	460.34	461.98	1245.44
9124	9	GC	FA	1	13.65	40.47	65.36	41.17	37.62	105.12	52.86	164.83	49.73	19.59	213	15.74	24.58	116.58	128	43.56	52.75	765.23	419.38	457.57	1184.6
9124	9	GC	FA	2	21.33	48.56	77.6	47.02	35.29	117.36	62.33	167.35	59.22	22.17	216.75	16.42	29.15	117.63	129.18	45.05	56.56	796.57	472.4	463.56	1268.97
9124	9	GC	FA	3	.	.	.	.	.	.	.	.	.	.	.	.	.	.	.	.	.	.	.	.	.

## Sheet: HE Value Pasture
Calculation for Human Edible (HE) value of Pasture, if land were used for Corn/Soybean production
Pasture yield			kg/ha (DM basis)
			20000
Corn yield			kg/ha (DM basis)
			5719
Soybean yield			kg/ha (DM basis)
			3206
Corn/Soy Blend	% Corn (ha)	% Soy (ha)	% corn (yield)	Total kg/ha (DM basis)
	0.7	0.3	0.817853	4894.89
Discount soybean hulls (-7.3%)			2971.96
		Corn/soy mix per unit of pasture
		Replacement value	0.244744
	Human-edible ME (Mcal/kg)	Human-edible CP (g/kg)	ME:Prot ratio (Mcal/g)
Milk @ 3.5% fat, 3.2% protein	0.69715	32	0.0217859
Corn	2.89536	80.04	0.0361739
Soybean (dehulled)	3.13	385	0.00812987
Corn/soy mix	2.9376	134.933	0.0217708		0.82
"Human value" of pasture (as-fed)	0.71896	33.0241
in land-use scenario

## Sheet: Ingredients
Nutrient Profiles						Human-edible value of feed		g HE SID aa/kg as-fed
Ingredient	DM%	starch (%DM)	sugar (%DM)	CP (%DM)	EE (%DM)	Mcal ME/kg as-fed	kg CP/kg as-fed	Arg	His	Ile	Leu	Lys	Met	Phe	Thr	Trp	Val	Cys	Tyr
Elephant Grass	19.9			18.75	1.66	0.71896	0.0330241
Steam-flaked corn	87	65		9.6	3.92	2.90302	0.08352	2.76834	1.71312	1.97456	7.18272	1.591	1.28484	2.8509	1.85416	0.4128	2.67976	1.3072	1.76644
Ground corn	87	65		9.2	4	2.89536	0.08004	2.76834	1.71312	1.97456	7.18272	1.591	1.28484	2.8509	1.85416	0.4128	2.67976	1.3072	1.76644
Soybean meal	89			48	6.5	2.22945	0.4272	28.8627	10.2528	16.9509	28.3518	23.4462	5.2866	18.7968	14.0709	5.34534	17.2669	5.2332	12.4529
Fat Supplement	98			0	84	7.4088	0	0	0	0	0	0	0	0	0	0	0	0	0
Milk								0.93808	0.84487	1.48096	2.67332	2.09417	0.67392	1.38866	1.27088	0.39091	1.63852	0.1729	1.05742
		Energy values for humans				Conversions
		Nutrient	kcal ME/g			MJ/Mcal	4.18
		Carbs	4
		Protein	4
		Fat	9

## Sheet: GC diet
Ingredient	% of diet as fed	kg/cow/day	Total human-edible (HE) nutrients per daily intake			Human-edible (HE) SID AA, g
			ME (Mcal)	CP (kg)			Arg	His	Ile	Leu	Lys	Met	Phe	Thr	Trp	Val	Cys	Tyr
Elephant Grass	80.9524	42.5	30.5558	1.40352		Elephant Grass	0	0	0	0	0	0	0	0	0	0	0	0
Steam-flaked corn	0	0	0	0		Steam-flaked corn	0	0	0	0	0	0	0	0	0	0	0	0
Ground corn	15.2381	8	23.1629	0.64032		Ground corn	22.1467	13.705	15.7965	57.4618	12.728	10.2787	22.8072	14.8333	3.3024	21.4381	10.4576	14.1315
Soybean meal	2.47619	1.3	2.89829	0.55536		Soybean meal	37.5215	13.3286	22.0362	36.8574	30.48	6.87258	24.4358	18.2922	6.94894	22.447	6.80316	16.1887
Fat Supplement	0	0	0	0		Fat Supplement	0	0	0	0	0	0	0	0	0	0	0	0
Vitamins, minerals etc.	1.33333	0.7	0	0		Vitamins, minerals etc.
Total	100	52.5				Total	59.6682	27.0336	37.8327	94.3192	43.208	17.1513	47.243	33.1255	10.2513	43.885	17.2608	30.3203
						g/kg as-fed intake	1.13654	0.514926	0.720623	1.79656	0.82301	0.326691	0.899867	0.630961	0.195264	0.835905	0.328776	0.577529
Actual intake as fed (kg/d)	52.5
Ingredient	% of diet, DM	kg DM/cow/day
Elephant Grass	48.5714	8.5
Steam-flaked corn	0	0
Ground corn	41.2457	7.218
Soybean meal	6.68571	1.17
Fat Supplement	0	0
Vitamins, minerals etc.	3.49714	0.612
Total	100	17.5
Actual intake DM (kg/d)	17.5	DM diet, %	33.3333
		Scenario	MJ HE ME/kg feed	kg HE CP/kg feed
		Pasture	2.07497	0.0227749
		Land Use	4.50779	0.0495086

## Sheet: GC + FA diet
Ingredient	% of diet as fed	kg/cow/day	Total human-edible (HE) nutrients per daily intake			Human-edible (HE) SID AA, g
			ME (Mcal)	CP (kg)			Arg	His	Ile	Leu	Lys	Met	Phe	Thr	Trp	Val	Cys	Tyr
Elephant Grass	80.3922	41	29.4774	1.35399		Elephant Grass	0	0	0	0	0	0	0	0	0	0	0	0
Steam-flaked corn	0	0	0	0		Steam-flaked corn	0	0	0	0	0	0	0	0	0	0	0	0
Ground corn	15.098	7.7	22.2943	0.616308		Ground corn	21.3162	13.191	15.2041	55.3069	12.2507	9.89327	21.9519	14.277	3.17856	20.6342	10.0654	13.6016
Soybean meal	2.54902	1.3	2.89828	0.55536		Soybean meal	37.5215	13.3286	22.0362	36.8574	30.48	6.87258	24.4358	18.2922	6.94894	22.447	6.80316	16.1887
Fat Supplement	0.823529	0.42	3.1117	0		Fat Supplement	0	0	0	0	0	0	0	0	0	0	0	0
Vitamins, minerals etc.	1.13725	0.58	0	0		Vitamins, minerals etc.
Total	100	51				Total	58.8377	26.5197	37.2403	92.1643	42.7307	16.7658	46.3878	32.5692	10.1275	43.0811	16.8686	29.7903
						g/kg as-fed intake	1.15368	0.519993	0.730203	1.80714	0.837857	0.328742	0.909564	0.638612	0.198578	0.844728	0.330757	0.584124
Actual intake as fed (kg/d)	51
Ingredient	% of diet, DM	kg DM/cow/day
Elephant Grass	47.6744	8.2
Steam-flaked corn	0	0
Ground corn	40.2907	6.93
Soybean meal	6.80233	1.17
Fat Supplement	2.19767	0.378
Vitamins, minerals etc.	3.03488	0.522
Total	100	17.2
Actual intake DM (kg/d)	17.2	DM diet, %	33.7255
		Scenario	MJ HE ME/kg feed	kg HE CP/kg feed
		Pasture	2.31984	0.0229739
		Land Use	4.73583	0.0495226

## Sheet: SF diet
Ingredient	% of diet as fed	kg/cow/day	Total human-edible (HE) nutrients per daily intake			Human-edible (HE) SID AA, g
			ME (Mcal)	CP (kg)			Arg	His	Ile	Leu	Lys	Met	Phe	Thr	Trp	Val	Cys	Tyr
Elephant Grass	80.9524	42.5	30.5558	1.40352		Elephant Grass	0	0	0	0	0	0	0	0	0	0	0	0
Steam-flaked corn	15.2381	8	23.2241	0.66816		Steam-flaked corn	22.1467	13.705	15.7965	57.4618	12.728	10.2787	22.8072	14.8333	3.3024	21.4381	10.4576	14.1315
Ground corn	0	0	0	0		Ground corn	0	0	0	0	0	0	0	0	0	0	0	0
Soybean meal	2.47619	1.3	2.89829	0.55536		Soybean meal	37.5215	13.3286	22.0362	36.8574	30.48	6.87258	24.4358	18.2922	6.94894	22.447	6.80316	16.1887
Fat Supplement	0	0	0	0		Fat Supplement	0	0	0	0	0	0	0	0	0	0	0	0
Vitamins, minerals etc.	1.33333	0.7	0	0		Vitamins, minerals etc.
Total	100	52.5				Total	59.6682	27.0336	37.8327	94.3192	43.208	17.1513	47.243	33.1255	10.2513	43.885	17.2608	30.3203
						g/kg as-fed intake	1.13654	0.514926	0.720623	1.79656	0.82301	0.326691	0.899867	0.630961	0.195264	0.835905	0.328776	0.577529
Actual intake as fed (kg/d)	52.5
Ingredient	% of diet, DM	kg DM/cow/day
Elephant Grass	48.5714	8.5
Steam-flaked corn	41.2571	7.22
Ground corn	0	0
Soybean meal	6.68571	1.17
Fat Supplement	0	0
Vitamins, minerals etc.	3.48571	0.61
Total	100	17.5
Actual intake DM (kg/d)	17.5	DM diet, %	33.3333
		Scenario	MJ HE ME/kg feed	kg HE CP/kg feed
		Pasture	2.07984	0.0233051
		Land Use	4.51267	0.0500389

## Sheet: SF + FA diet
Ingredient	% of diet as fed	kg/cow/day	Total human-edible (HE) nutrients per daily intake			Human-edible (HE) SID AA, g
			ME (Mcal)	CP (kg)			Arg	His	Ile	Leu	Lys	Met	Phe	Thr	Trp	Val	Cys	Tyr
Elephant Grass	79.3814	38.5	27.68	1.27143		Elephant Grass	0	0	0	0	0	0	0	0	0	0	0	0
Steam-flaked corn	15.8763	7.7	22.3532	0.643104		Steam-flaked corn	21.3162	13.191	15.2041	55.3069	12.2507	9.89327	21.9519	14.277	3.17856	20.6342	10.0654	13.6016
Ground corn	0	0	0	0		Ground corn	0	0	0	0	0	0	0	0	0	0	0	0
Soybean meal	2.68041	1.3	2.89828	0.55536		Soybean meal	37.5215	13.3286	22.0362	36.8574	30.48	6.87258	24.4358	18.2922	6.94894	22.447	6.80316	16.1887
Fat Supplement	0.865979	0.42	3.1117	0		Fat Supplement	0	0	0	0	0	0	0	0	0	0	0	0
Vitamins, minerals etc.	1.19588	0.58	0	0		Vitamins, minerals etc.
Total	100	48.5				Total	58.8377	26.5197	37.2403	92.1643	42.7307	16.7658	46.3878	32.5692	10.1275	43.0811	16.8686	29.7903
						g/kg as-fed intake	1.21315	0.546797	0.767842	1.9003	0.881046	0.345688	0.956449	0.67153	0.208814	0.88827	0.347806	0.614234
Actual intake as fed (kg/d)	48.5
Ingredient	% of diet, DM	kg DM/cow/day
Elephant Grass	46.1078	7.7
Steam-flaked corn	41.497	6.93
Ground corn	0	0
Soybean meal	7.00599	1.17
Fat Supplement	2.26347	0.378
Vitamins, minerals etc.	3.12575	0.522
Total	100	16.7
Actual intake DM (kg/d)	16.7	DM diet, %	34.433
		Scenario	MJ HE ME/kg feed	kg HE CP/kg feed
		Pasture	2.4445	0.0247106
		Land Use	4.83011	0.0509256

## Sheet: HE calculations
					Milk yield, kg	Milk protein, %	Milk fat, %	Milk Lactose, %	Protein yield, kg	Fat yield, kg	Lactose yield, kg	DMI, kg DM	DMI, kg as fed	Human-edible inputs-Pasture		Human-edible inputs-Land		Milk energy (Mcal/kg)	Milk energy (MJ/kg)	Energy output (MJ/d)	Protein output (kg/d)	Human-edible inputs-Pasture		Human-edible inputs-Land		Intake of HE SID aa, g/d												Milk of HE SID aa, g/d
Cow	Block	Corn_method	FA_Sup	week										Energy (MJ/d)	CP (kg/d)	Energy (MJ/d)	CP (kg/d)			EO	CPO	Milk ME/input ME	Milk CP/input CP	Milk ME/input ME	Milk CP/input CP	Arg	His	Ile	Leu	Lys	Met	Phe	Thr	Trp	Val	Cys	Tyr	Arg	His	Ile	Leu	Lys	Met	Phe	Thr	Trp	Val	Cys	Tyr
1895	3	SF	FA	6	28.2	3.21	3.01	4.85	0.90522	0.84882	1.3677	17.57	51.0266	124.735	1.2609	246.464	2.59856	0.654174	2.73445	77.1114	0.90522	0.618204	0.717916	0.31287	0.348354	61.9029	27.9012	39.1804	96.9657	44.9568	17.6393	48.8044	34.2659	10.6551	45.3255	17.7474	31.3423	26.4539	23.8253	41.7631	75.3876	59.0556	19.0045	39.1602	35.8388	11.0237	46.2063	4.87578	29.8192
1972	9	SF	FA	6	30.4	3.2	3.15	4.7	0.9728	0.9576	1.4288	12.7	36.8832	90.161	0.911407	178.15	1.8783	0.660685	2.76166	83.9546	0.9728	0.931163	1.06736	0.471257	0.517915	44.7449	20.1676	28.3205	70.089	32.4958	12.7501	35.2769	24.7682	7.70175	32.7623	12.8282	22.6549	28.5176	25.684	45.0212	81.2689	63.6628	20.4872	42.2153	38.6348	11.8837	49.811	5.25616	32.1456
4330	1	SF	FA	6	29.6	3.8	2.43	4.34	1.1248	0.71928	1.28464	20.84	60.5234	147.949	1.49557	292.335	3.08219	0.613777	2.56559	75.9414	1.1248	0.513294	0.752089	0.259776	0.364936	73.4238	33.094	46.4724	115.012	53.3238	20.9222	57.8875	40.6432	12.6382	53.7611	21.0504	37.1755	27.7672	25.0082	43.8364	79.1303	61.9874	19.948	41.1043	37.618	11.5709	48.5002	5.11784	31.2996
9102	6	SF	FA	6	16.8	3.02	3.4	4.77	0.50736	0.5712	0.80136	20.07	58.2871	142.483	1.44031	281.533	2.9683	0.676415	2.82741	47.5006	0.50736	0.333378	0.352258	0.168721	0.170926	70.711	31.8712	44.7553	110.763	51.3536	20.1491	55.7487	39.1415	12.1712	51.7747	20.2726	35.8019	15.7597	14.1938	24.8801	44.9118	35.1821	11.3219	23.3295	21.3508	6.56729	27.5271	2.90472	17.7647
9103	2	SF	FA	6	24.4	3.7	3.1	4.44	0.9028	0.7564	1.08336	20.77	60.3201	147.452	1.49054	291.353	3.07183	0.67427	2.81845	68.7701	0.9028	0.466389	0.605685	0.236037	0.293896	73.1772	32.9828	46.3163	114.626	53.1447	20.8519	57.6931	40.5067	12.5957	53.5805	20.9797	37.0506	22.8892	20.6148	36.1354	65.229	51.0977	16.4436	33.8833	31.0095	9.5382	39.9799	4.21876	25.801
9106	4	SF	FA	6	27.2	3.8	3.21	4.79	1.0336	0.87312	1.30288	15.95	46.3219	113.234	1.14464	223.74	2.35897	0.704014	2.94278	80.0436	1.0336	0.706888	0.902991	0.357753	0.438158	56.1953	25.3287	35.5679	88.0252	40.8117	16.0129	44.3045	31.1065	9.67267	41.1463	16.111	28.4524	25.5158	22.9805	40.2821	72.7143	56.9614	18.3306	37.7716	34.5679	10.6328	44.5677	4.70288	28.7618
9110	5	SF	FA	6	26.8	4	2.9	4.83	1.072	0.7772	1.29444	15.23	44.2308	108.122	1.09297	213.64	2.25248	0.688195	2.87666	77.0944	1.072	0.71303	0.980813	0.360861	0.47592	53.6586	24.1853	33.9623	84.0517	38.9694	15.2901	42.3045	29.7023	9.23604	39.2889	15.3838	27.1681	25.1405	22.6425	39.6897	71.645	56.1238	18.0611	37.2161	34.0596	10.4764	43.9123	4.63372	28.3389
9121	7	SF	FA	6	25.8	3.28	2.29	4.56	0.84624	0.59082	1.17648	16.95	49.226	120.333	1.21641	237.767	2.50686	0.579821	2.42365	62.5302	0.84624	0.519643	0.695689	0.262989	0.337569	59.7185	26.9167	37.7978	93.544	43.3704	17.0168	47.0822	33.0568	10.2791	43.726	17.1211	30.2363	24.2025	21.7976	38.2088	68.9717	54.0296	17.3871	35.8274	32.7887	10.0855	42.2738	4.46082	27.2814
9122	8	SF	FA	6	29	2.81	3.24	4.76	0.8149	0.9396	1.3804	18.18	52.7982	129.065	1.30468	255.021	2.68878	0.649186	2.7136	78.6943	0.8149	0.609726	0.6246	0.308579	0.303074	64.0521	28.8699	40.5407	100.332	46.5176	18.2517	50.4988	35.4556	11.025	46.8991	18.3635	32.4304	27.2043	24.5012	42.9478	77.5263	60.7309	19.5437	40.2711	36.8555	11.3364	47.5171	5.0141	30.6652
9125	10	SF	FA	6	25.4	3.72	3.56	4.52	0.94488	0.90424	1.14808	15.2	44.1437	107.909	1.09082	213.219	2.24804	0.721304	3.01505	76.5823	0.94488	0.709692	0.866213	0.359172	0.420312	53.5529	24.1377	33.8954	83.8861	38.8926	15.2599	42.2212	29.6438	9.21785	39.2115	15.3535	27.1146	23.8272	21.4597	37.6164	67.9023	53.1919	17.1176	35.272	32.2804	9.92911	41.6184	4.39166	26.8585
9129	11	SF	FA	6	26.52	3.21444	3.09222	4.63222	0.852471	0.820057	1.22847	13.7	39.7874	97.2603	0.983171	192.178	2.0262	0.653464	2.73148	72.4388	0.852471	0.744793	0.867062	0.376936	0.420724	48.2681	21.7557	30.5505	75.6079	35.0545	13.754	38.0546	26.7184	8.30819	35.342	13.8383	24.4388	24.8779	22.406	39.2751	70.8964	55.5374	17.8724	36.8273	33.7037	10.3669	43.4536	4.58531	28.0428
1895	3	SF	FA	14	31.8	3.4	3.63	4.71	1.0812	1.15434	1.49778	16.38	47.5707	116.286	1.1755	229.772	2.42256	0.717072	2.99736	95.3161	1.0812	0.819666	0.919779	0.41483	0.446304	57.7103	26.0115	36.5267	90.3983	41.9119	16.4446	45.4989	31.9451	9.93344	42.2556	16.5454	29.2195	29.8309	26.8669	47.0945	85.0116	66.5946	21.4307	44.1594	40.414	12.4309	52.1049	5.49822	33.626
1972	9	SF	FA	14	31.4	2.92	3.22	4.54	0.91688	1.01108	1.42556	14.67	42.6045	104.147	1.05278	205.784	2.16966	0.644908	2.69572	84.6455	0.91688	0.812753	0.870911	0.411331	0.422592	51.6856	23.296	32.7135	80.9611	37.5365	14.7278	40.749	28.6102	8.89643	37.8443	14.8181	26.1691	29.4557	26.5289	46.5021	83.9422	65.7569	21.1611	43.6039	39.9056	12.2746	51.4495	5.42906	33.203
4330	1	SF	FA	14	32.2	3.21	2.51	4.65	1.03362	0.80822	1.4973	17.59	51.0847	124.877	1.26233	246.745	2.60152	0.599824	2.50726	80.7339	1.03362	0.64651	0.818816	0.327196	0.397314	61.9734	27.933	39.225	97.0761	45.008	17.6594	48.8599	34.3049	10.6672	45.377	17.7676	31.378	30.2062	27.2048	47.6869	86.0809	67.4323	21.7002	44.7149	40.9223	12.5873	52.7603	5.56738	34.0489
9102	6	SF	FA	14	20.8	3.04	3.03	4.83	0.63232	0.63024	1.00464	20	58.0838	141.986	1.43529	280.551	2.95795	0.645552	2.69841	56.1269	0.63232	0.395299	0.440553	0.200059	0.21377	70.4643	31.7601	44.5992	110.376	51.1745	20.0789	55.5542	39.005	12.1287	51.5941	20.2019	35.677	19.5121	17.5733	30.804	55.6051	43.5587	14.0175	28.8841	26.4343	8.13093	34.0812	3.59632	21.9943
9103	2	SF	FA	14	22.6	3.13	3.17	4.63	0.70738	0.71642	1.04638	22.7	65.9251	161.154	1.62905	318.426	3.35728	0.655788	2.74119	61.951	0.70738	0.384421	0.434229	0.194554	0.210701	79.977	36.0477	50.6201	125.277	58.0831	22.7895	63.054	44.2707	13.7661	58.5594	22.9292	40.4934	21.2006	19.0941	33.4697	60.417	47.3282	15.2306	31.3837	28.7219	8.83457	37.0306	3.90754	23.8977
9106	4	SF	FA	14	28.2	3.03	3.26	4.72	0.85446	0.91932	1.33104	15.06	43.7371	106.915	1.08077	211.255	2.22734	0.662004	2.76718	78.0344	0.85446	0.729871	0.790603	0.369384	0.383624	53.0597	23.9153	33.5832	83.1135	38.5344	15.1194	41.8323	29.3708	9.13294	38.8504	15.212	26.8648	26.4539	23.8253	41.7631	75.3876	59.0556	19.0045	39.1602	35.8388	11.0237	46.2063	4.87578	29.8192
9110	5	SF	FA	14	27	3.8	2.97	4.56	1.026	0.8019	1.2312	15.4	44.7246	109.329	1.10517	216.025	2.27762	0.672633	2.81161	75.9134	1.026	0.694356	0.928364	0.351411	0.45047	54.2575	24.4553	34.3414	84.9899	39.4044	15.4607	42.7767	30.0339	9.33913	39.7275	15.5555	27.4713	25.3282	22.8115	39.9859	72.1796	56.5426	18.1958	37.4938	34.3138	10.5546	44.24	4.6683	28.5503
9121	7	SF	FA	14	22.4	3.2	2.6	4.53	0.7168	0.5824	1.01472	14.04	40.7749	99.6741	1.00757	196.947	2.07648	0.602875	2.52002	56.4484	0.7168	0.56633	0.711414	0.286617	0.345199	49.466	22.2956	31.3086	77.4843	35.9245	14.0954	38.9991	27.3815	8.51438	36.2191	14.1817	25.0453	21.013	18.9251	33.1735	59.8824	46.9094	15.0958	31.106	28.4677	8.75638	36.7028	3.87296	23.6862
9122	8	SF	FA	14	26.8	3.2	3.44	4.52	0.8576	0.92192	1.21136	14.26	41.4138	101.236	1.02336	200.033	2.10902	0.680516	2.84456	76.2341	0.8576	0.753034	0.838025	0.381107	0.406634	50.2411	22.6449	31.7992	78.6984	36.4874	14.3162	39.6102	27.8106	8.6478	36.7866	14.404	25.4377	25.1405	22.6425	39.6897	71.645	56.1238	18.0611	37.2161	34.0596	10.4764	43.9123	4.63372	28.3389
9125	10	SF	FA	14	22	3.21	3.35	4.47	0.7062	0.737	0.9834	16.22	47.106	115.151	1.16402	227.527	2.3989	0.67075	2.80373	61.6822	0.7062	0.535666	0.606692	0.271098	0.294385	57.1466	25.7574	36.17	89.5153	41.5025	16.284	45.0545	31.6331	9.83641	41.8428	16.3838	28.9341	20.6378	18.5871	32.5811	58.813	46.0717	14.8262	30.5505	27.9594	8.60002	36.0474	3.8038	23.2632
9129	11	SF	FA	14	26.36	3.454	3.029	4.656	0.910474	0.798444	1.22732	14.4	41.8204	102.23	1.03341	201.997	2.12973	0.662184	2.76793	72.9626	0.910474	0.713712	0.881042	0.361206	0.427508	50.7343	22.8673	32.1114	79.471	36.8456	14.4568	39.999	28.0836	8.7327	37.1478	14.5454	25.6875	24.7278	22.2708	39.0381	70.4687	55.2023	17.7645	36.6051	33.5004	10.3044	43.1914	4.55764	27.8736
1905	6	SF	NO	6	22.4	3.17	3.6	4.71	0.71008	0.8064	1.05504	15.6	46.8	97.3366	1.09068	211.193	2.34182	0.701175	2.93091	65.6524	0.71008	0.674489	0.651043	0.310865	0.303217	53.19	24.0985	33.7252	84.0788	38.5169	15.2892	42.1138	29.529	9.13834	39.1204	15.3867	27.0283	21.013	18.9251	33.1735	59.8824	46.9094	15.0958	31.106	28.4677	8.75638	36.7028	3.87296	23.6862
1961	1	SF	NO	6	24.2	3.6	3.5	4.24	0.8712	0.847	1.02608	16.35	49.05	102.016	1.14312	221.346	2.45441	0.69783	2.91693	70.5897	0.8712	0.691946	0.762127	0.318911	0.354953	55.7472	25.2571	35.3466	88.121	40.3686	16.0242	44.1385	30.9486	9.57768	41.0012	16.1265	28.3278	22.7015	20.4459	35.8392	64.6943	50.6789	16.3089	33.6056	30.7553	9.46002	39.6522	4.18418	25.5896
2040	3	SF	NO	6	20.4	3.42	2.98	4.56	0.69768	0.60792	0.93024	19.04	57.12	118.801	1.33119	257.763	2.85822	0.651902	2.72495	55.589	0.69768	0.467919	0.524103	0.215659	0.244096	64.919	29.4126	41.162	102.619	47.0103	18.6606	51.4004	36.0405	11.1535	47.7469	18.7797	32.9884	19.1368	17.2353	30.2116	54.5357	42.7211	13.748	28.3287	25.926	7.97456	33.4258	3.52716	21.5714
2071	10	SF	NO	6	18	3.5	4.17	4.75	0.63	0.7506	0.855	13.21	39.63	82.4241	0.923583	178.837	1.98304	0.774518	3.23749	58.2747	0.63	0.707011	0.682126	0.325854	0.317694	45.041	20.4065	28.5583	71.1975	32.6159	12.9468	35.6617	25.005	7.7383	33.1269	13.0294	22.8875	16.8854	15.2077	26.6573	48.1198	37.6951	12.1306	24.9959	22.8758	7.03638	29.4934	3.1122	19.0336
9107	2	SF	NO	6	19.8	3.39	3.31	4.96	0.67122	0.65538	0.98208	16.78	50.34	104.699	1.17318	227.168	2.51896	0.696649	2.91199	57.6575	0.67122	0.550696	0.572137	0.25381	0.266467	57.2133	25.9214	36.2762	90.4386	41.4303	16.4456	45.2993	31.7626	9.82957	42.0795	16.5506	29.0728	18.574	16.7284	29.323	52.9317	41.4646	13.3436	27.4955	25.1634	7.74002	32.4427	3.42342	20.9369
9108	4	SF	NO	6	27.4	3.7	2.91	5.02	1.0138	0.79734	1.37548	18.45	55.35	115.119	1.28994	249.776	2.76965	0.679529	2.84043	77.8278	1.0138	0.676063	0.785928	0.31159	0.366039	62.9074	28.5011	39.8865	99.4393	45.5536	18.0824	49.8077	34.9237	10.8078	46.2674	18.1978	31.9662	25.7034	23.1494	40.5783	73.249	57.3803	18.4654	38.0493	34.8221	10.7109	44.8954	4.73746	28.9733
9113	5	SF	NO	6	23	3	2.91	4.77	0.69	0.6693	1.0971	16.6	49.8	103.576	1.1606	224.731	2.49194	0.629754	2.63237	60.5445	0.69	0.584542	0.594522	0.269409	0.276893	56.5996	25.6433	35.887	89.4685	40.9859	16.2692	44.8134	31.4219	9.72413	41.6281	16.3731	28.7609	21.5758	19.432	34.0621	61.4864	48.1659	15.5002	31.9392	29.2302	8.99093	37.686	3.9767	24.3207
9114	8	SF	NO	6	20.4	3.7	3.23	4.59	0.7548	0.65892	0.93636	20.09	60.27	125.352	1.4046	271.978	3.01584	0.692272	2.8937	59.0314	0.7548	0.470925	0.537377	0.217045	0.250278	68.4991	31.0346	43.4319	108.278	49.6028	19.6897	54.235	38.028	11.7685	50.38	19.8154	34.8077	19.1368	17.2353	30.2116	54.5357	42.7211	13.748	28.3287	25.926	7.97456	33.4258	3.52716	21.5714
9115	9	SF	NO	6	21.4	3.26	2.47	4.52	0.69764	0.52858	0.96728	17.61	52.83	109.878	1.23121	238.404	2.64356	0.593823	2.48218	53.1187	0.69764	0.483433	0.566629	0.222809	0.263902	60.0433	27.2035	38.0705	94.912	43.4796	17.2591	47.54	33.3337	10.3158	44.1609	17.3693	30.5108	20.0749	18.0802	31.6925	57.209	44.8152	14.4219	29.7173	27.1968	8.36547	35.0643	3.70006	22.6288
9118	7	SF	NO	6	23	3.17	3.28	4.99	0.7291	0.7544	1.1477	17.75	53.25	110.752	1.241	240.299	2.66457	0.682507	2.85288	65.6162	0.7291	0.592463	0.587511	0.27306	0.273628	60.5206	27.4198	38.3732	95.6666	43.8253	17.3963	47.9179	33.5987	10.3978	44.512	17.5073	30.7534	21.5758	19.432	34.0621	61.4864	48.1659	15.5002	31.9392	29.2302	8.99093	37.686	3.9767	24.3207
9127	11	SF	NO	6	23.12	3.48111	3.21444	4.59444	0.804833	0.74318	1.06224	18.5	55.5	115.431	1.29344	250.453	2.77716	0.678526	2.83624	65.5738	0.804833	0.568077	0.622244	0.261821	0.289804	63.0778	28.5784	39.9946	99.7088	45.677	18.1314	49.9426	35.0183	10.8371	46.3928	18.2471	32.0529	21.6884	19.5334	34.2398	61.8072	48.4172	15.581	32.1058	29.3827	9.03784	37.8826	3.99745	24.4476
1905	6	SF	NO	14	23.6	3.39	3.29	4.56	0.80004	0.77644	1.07616	19.2	57.6	119.799	1.34238	259.93	2.88224	0.678991	2.83818	66.9811	0.80004	0.559113	0.595988	0.257689	0.277576	65.4646	29.6597	41.5079	103.482	47.4054	18.8174	51.8324	36.3434	11.2472	48.1482	18.9375	33.2657	22.1387	19.9389	34.9507	63.0904	49.4224	15.9045	32.7724	29.9928	9.22548	38.6691	4.08044	24.9551
1961	1	SF	NO	14	21	3.25	3.4	4.25	0.6825	0.714	0.8925	16.32	48.96	101.829	1.14102	220.94	2.4499	0.668985	2.79636	58.7235	0.6825	0.576687	0.598149	0.265789	0.278582	55.6449	25.2108	35.2817	87.9593	40.2946	15.9948	44.0575	30.8918	9.56011	40.9259	16.0969	28.2758	19.6997	17.7423	31.1002	56.1397	43.9776	14.1523	29.1619	26.6885	8.20911	34.4089	3.6309	22.2058
2040	3	SF	NO	14	22	3.39	3.18	4.45	0.7458	0.6996	0.979	17.61	52.83	109.878	1.23121	238.404	2.64356	0.664427	2.7773	61.1007	0.7458	0.556078	0.605745	0.25629	0.28212	60.0433	27.2035	38.0705	94.912	43.4796	17.2591	47.54	33.3337	10.3158	44.1609	17.3693	30.5108	20.6378	18.5871	32.5811	58.813	46.0717	14.8262	30.5505	27.9594	8.60002	36.0474	3.8038	23.2632
2071	10	SF	NO	14	22.2	3.25	3.5	4.51	0.7215	0.777	1.00122	16.55	49.65	103.264	1.1571	224.054	2.48443	0.688545	2.87812	63.8942	0.7215	0.618746	0.623541	0.285174	0.290409	56.4291	25.5661	35.7789	89.199	40.8624	16.2202	44.6784	31.3272	9.69484	41.5027	16.3237	28.6743	20.8254	18.7561	32.8773	59.3477	46.4906	14.961	30.8283	28.2135	8.6782	36.3751	3.83838	23.4747
9107	2	SF	NO	14	24	3.44	3.45	4.8	0.8256	0.828	1.152	14.98	44.94	93.4681	1.04733	202.799	2.24875	0.706185	2.95185	70.8445	0.8256	0.757954	0.788288	0.349333	0.367138	51.076	23.1408	32.3848	80.7372	36.9861	14.6815	40.44	28.3554	8.77515	37.5656	14.7752	25.9541	22.5139	20.2769	35.543	64.1597	50.2601	16.1741	33.3278	30.5011	9.38184	39.3245	4.1496	25.3781
9108	4	SF	NO	14	26.6	3.9	2.62	5.03	1.0374	0.69692	1.33798	18.2	54.6	113.559	1.27246	246.392	2.73212	0.664383	2.77712	73.8714	1.0374	0.650509	0.815271	0.299813	0.379705	62.055	28.1149	39.346	98.0919	44.9363	17.8374	49.1328	34.4505	10.6614	45.6404	17.9512	31.5331	24.9529	22.4735	39.3935	71.1103	55.7049	17.9263	36.9384	33.8054	10.3982	43.5846	4.59914	28.1274
9113	5	SF	NO	14	25.2	3.6	3.07	4.63	0.9072	0.77364	1.16676	19.4	58.2	121.047	1.35636	262.637	2.91226	0.673288	2.81434	70.9215	0.9072	0.585901	0.668849	0.270036	0.31151	66.1465	29.9687	41.9403	104.56	47.8992	19.0134	52.3723	36.7219	11.3643	48.6497	19.1348	33.6122	23.6396	21.2907	37.3202	67.3677	52.7731	16.9828	34.9942	32.0262	9.85093	41.2907	4.35708	26.647
9114	8	SF	NO	14	23.4	3.64	3.12	4.57	0.85176	0.73008	1.06938	17.03	51.09	106.259	1.19066	230.552	2.55649	0.677843	2.83338	66.3012	0.85176	0.623958	0.715368	0.287576	0.333176	58.0657	26.3076	36.8166	91.786	42.0476	16.6907	45.9742	32.2358	9.97602	42.7064	16.7972	29.5059	21.9511	19.77	34.6545	62.5557	49.0036	15.7697	32.4946	29.7386	9.14729	38.3414	4.04586	24.7436
9115	9	SF	NO	14	22.2	3.41	3.08	4.18	0.75702	0.68376	0.92796	17.27	51.81	107.757	1.20744	233.801	2.59252	0.645612	2.69866	59.9102	0.75702	0.555977	0.626963	0.256244	0.292002	58.884	26.6783	37.3355	93.0795	42.6401	16.9259	46.6221	32.6901	10.1166	43.3083	17.0339	29.9218	20.8254	18.7561	32.8773	59.3477	46.4906	14.961	30.8283	28.2135	8.6782	36.3751	3.83838	23.4747
9118	7	SF	NO	14	21	3.31	3.72	4.88	0.6951	0.7812	1.0248	19.43	58.29	121.234	1.35846	263.043	2.91677	0.727018	3.03894	63.8176	0.6951	0.526401	0.511684	0.242613	0.238312	66.2488	30.015	42.0051	104.721	47.9732	19.0428	52.4533	36.7787	11.3819	48.7249	19.1644	33.6642	19.6997	17.7423	31.1002	56.1397	43.9776	14.1523	29.1619	26.6885	8.20911	34.4089	3.6309	22.2058
9127	11	SF	NO	14	22	3.391	3.236	4.711	0.74602	0.71192	1.03642	18.65	55.95	116.367	1.30392	252.484	2.79968	0.679996	2.84238	62.5324	0.74602	0.537372	0.572135	0.247669	0.266467	63.5893	28.8101	40.3189	100.517	46.0474	18.2784	50.3476	35.3023	10.925	46.7689	18.395	32.3127	20.6378	18.5871	32.5811	58.813	46.0717	14.8262	30.5505	27.9594	8.60002	36.0474	3.8038	23.2632
1629	6	GC	FA	6	31.2	2.84	2.88	4.39	0.88608	0.89856	1.36968	18.02	53.4314	123.952	1.22753	253.042	2.64606	0.602837	2.51986	78.6196	0.88608	0.634273	0.721842	0.310698	0.334867	61.6428	27.784	39.0157	96.5582	44.7679	17.5652	48.5993	34.1219	10.6103	45.135	17.6728	31.2106	29.2681	26.3599	46.206	83.4076	65.3381	21.0263	43.3262	39.6515	12.1964	51.1218	5.39448	32.9915
1654	7	GC	FA	6	29.2	3.18	3.25	4.62	0.92856	0.949	1.34904	20.43	60.5773	140.53	1.3917	286.884	2.99995	0.665675	2.78252	81.2496	0.92856	0.578167	0.667215	0.283215	0.309525	69.8869	31.4998	44.2337	109.472	50.7551	19.9143	55.099	38.6854	12.0294	51.1713	20.0364	35.3847	27.3919	24.6702	43.244	78.0609	61.1498	19.6785	40.5489	37.1097	11.4146	47.8448	5.04868	30.8767
1949	1	GC	FA	6	25	3.13	3.46	4.65	0.7825	0.865	1.1625	16.54	49.043	113.772	1.12671	232.259	2.42874	0.683519	2.85711	71.4277	0.7825	0.627815	0.694501	0.307535	0.322184	56.58	25.502	35.8113	88.6278	41.091	16.1225	44.6078	31.3195	9.73889	41.428	16.2213	28.6472	23.452	21.1217	37.024	66.833	52.3543	16.848	34.7165	31.772	9.77275	40.963	4.3225	26.4355
4060	3	GC	FA	6	23	2.49	3.16	3.86	0.5727	0.7268	0.8878	15.08	44.714	103.729	1.02725	211.758	2.21435	0.587964	2.45769	56.5269	0.5727	0.544947	0.557506	0.266941	0.258631	51.5856	23.251	32.6502	80.8045	37.4639	14.6994	40.6702	28.5549	8.87923	37.7711	14.7894	26.1185	21.5758	19.432	34.0621	61.4864	48.1659	15.5002	31.9392	29.2302	8.99093	37.686	3.9767	24.3207
9101	2	GC	FA	6	20.8	2.87	3.25	4.73	0.59696	0.676	0.98384	17.12	50.7628	117.761	1.16622	240.404	2.51391	0.65235	2.72682	56.7179	0.59696	0.481634	0.511877	0.235928	0.237463	58.5641	26.3963	37.0671	91.7357	42.532	16.6879	46.172	32.4177	10.0804	42.8807	16.7901	29.6518	19.5121	17.5733	30.804	55.6051	43.5587	14.0175	28.8841	26.4343	8.13093	34.0812	3.59632	21.9943
9109	4	GC	FA	6	17.2	3.02	3.4	4.74	0.51944	0.5848	0.81528	14.36	42.5791	98.7766	0.978207	201.647	2.10863	0.67523	2.82246	48.5463	0.51944	0.491476	0.531013	0.240749	0.24634	49.1227	22.1408	31.0913	76.9465	35.6752	13.9975	38.7284	27.1915	8.45529	35.9677	14.0833	24.8715	16.135	14.5318	25.4725	45.9811	36.0197	11.5914	23.885	21.8591	6.72365	28.1825	2.97388	18.1876
9112	5	GC	FA	6	20.8	3.5	4.34	4.65	0.728	0.90272	0.9672	14.3	42.4012	98.3639	0.974119	200.805	2.09982	0.786361	3.28699	68.3694	0.728	0.695066	0.747342	0.340477	0.346697	48.9174	22.0483	30.9614	76.625	35.5261	13.939	38.5666	27.0779	8.41996	35.8174	14.0245	24.7675	19.5121	17.5733	30.804	55.6051	43.5587	14.0175	28.8841	26.4343	8.13093	34.0812	3.59632	21.9943
9117	8	GC	FA	6	23.4	3.1	3.46	4.82	0.7254	0.80964	1.12788	16.2	48.0349	111.433	1.10355	227.485	2.37881	0.688524	2.87803	67.3459	0.7254	0.604361	0.657334	0.296046	0.304942	55.4169	24.9778	35.0752	86.8059	40.2464	15.7911	43.6908	30.6756	9.53869	40.5764	15.8879	28.0583	21.9511	19.77	34.6545	62.5557	49.0036	15.7697	32.4946	29.7386	9.14729	38.3414	4.04586	24.7436
9124	9	GC	FA	6	24	2.99	3.58	4.63	0.7176	0.8592	1.1112	16.53	49.0134	113.703	1.12603	232.119	2.42727	0.685897	2.86705	68.8092	0.7176	0.605165	0.637285	0.296439	0.295641	56.5458	25.4866	35.7897	88.5742	41.0662	16.1128	44.5808	31.3005	9.733	41.4029	16.2115	28.6299	22.5139	20.2769	35.543	64.1597	50.2601	16.1741	33.3278	30.5011	9.38184	39.3245	4.1496	25.3781
9126	10	GC	FA	6	21	3.1	3.31	4.71	0.651	0.6951	0.9891	18.55	55.0029	127.598	1.26363	260.484	2.72389	0.670244	2.80162	58.834	0.651	0.461089	0.515182	0.225864	0.238997	63.4558	28.6011	40.1633	99.3982	46.0846	18.0818	50.0287	35.1255	10.9224	46.4625	18.1926	32.1285	19.6997	17.7423	31.1002	56.1397	43.9776	14.1523	29.1619	26.6885	8.20911	34.4089	3.6309	22.2058
9130	11	GC	FA	6	24.56	3.11333	3.39444	4.49111	0.764635	0.833676	1.10302	17.5	51.8895	120.375	1.1921	245.74	2.56971	0.670203	2.80145	68.8036	0.764635	0.571575	0.641416	0.279985	0.297557	59.864	26.9822	37.8899	93.7719	43.476	17.0583	47.1969	33.1373	10.3041	43.8325	17.1628	30.3099	23.0392	20.75	36.3724	65.6567	51.4328	16.5515	34.1055	31.2128	9.60075	40.2421	4.24642	25.9702
1629	6	GC	FA	14	31	3.35	3.56	4.25	1.0385	1.1036	1.3175	15.98	47.3826	109.92	1.08856	224.396	2.34651	0.689549	2.88231	89.3518	1.0385	0.812881	0.954011	0.398189	0.442572	54.6644	24.6386	34.5989	85.6271	39.6998	15.5766	43.0975	30.2591	9.40916	40.0254	15.6721	27.6773	29.0805	26.191	45.9098	82.8729	64.9193	20.8915	43.0485	39.3973	12.1182	50.7941	5.3599	32.78
1654	7	GC	FA	14	26.8	2.97	3.35	4.39	0.79596	0.8978	1.17652	17.8	52.7791	122.439	1.21254	249.953	2.61376	0.65391	2.73334	73.2536	0.79596	0.598287	0.65644	0.29307	0.304527	60.8902	27.4448	38.5394	95.3794	44.2213	17.3507	48.0059	33.7053	10.4808	44.5839	17.457	30.8295	25.1405	22.6425	39.6897	71.645	56.1238	18.0611	37.2161	34.0596	10.4764	43.9123	4.63372	28.3389
1949	1	GC	FA	14	27.8	3.24	3.38	4.67	0.90072	0.93964	1.29826	18.82	55.8035	129.455	1.28202	264.276	2.76354	0.683147	2.85555	79.3844	0.90072	0.61322	0.702577	0.300385	0.32593	64.3794	29.0174	40.7479	100.845	46.7553	18.345	50.7569	35.6368	11.0814	47.1387	18.4574	32.5962	26.0786	23.4874	41.1707	74.3183	58.2179	18.735	38.6047	35.3305	10.8673	45.5509	4.80662	29.3963
4060	3	GC	FA	14	27.2	2.52	3.08	3.76	0.68544	0.83776	1.02272	17.5	51.8895	120.375	1.1921	245.74	2.56971	0.578292	2.41726	65.7495	0.68544	0.546204	0.574983	0.267557	0.266739	59.864	26.9822	37.8899	93.7719	43.476	17.0583	47.1969	33.1373	10.3041	43.8325	17.1628	30.3099	25.5158	22.9805	40.2821	72.7143	56.9614	18.3306	37.7716	34.5679	10.6328	44.5677	4.70288	28.7618
9101	2	GC	FA	14	23.8	3.05	3.32	4.79	0.7259	0.79016	1.14002	21.03	62.3564	144.657	1.43257	295.309	3.08805	0.671483	2.8068	66.8018	0.7259	0.461795	0.506712	0.22621	0.235067	71.9394	32.4249	45.5328	112.687	52.2457	20.4992	56.7171	39.8215	12.3826	52.6742	20.6248	36.4239	22.3263	20.1079	35.2468	63.625	49.8412	16.0393	33.0501	30.2469	9.30366	38.9968	4.11502	25.1666
9109	4	GC	FA	14	20.4	3.1	3.6	4.69	0.6324	0.7344	0.95676	15.61	46.2855	107.375	1.06336	219.2	2.29218	0.696395	2.91093	59.383	0.6324	0.553044	0.59472	0.270908	0.275895	53.3987	24.0681	33.7978	83.6445	38.7806	15.216	42.0996	29.5584	9.1913	39.0986	15.3092	27.0365	19.1368	17.2353	30.2116	54.5357	42.7211	13.748	28.3287	25.926	7.97456	33.4258	3.52716	21.5714
9112	5	GC	FA	14	23.2	3.4	4.64	4.47	0.7888	1.07648	1.03704	17.26	51.1779	118.724	1.17576	242.37	2.53446	0.801421	3.34994	77.7186	0.7888	0.654613	0.670888	0.320661	0.311229	59.043	26.6122	37.3702	92.4858	42.8798	16.8243	46.5496	32.6828	10.1628	43.2314	16.9274	29.8943	21.7635	19.601	34.3583	62.021	48.5847	15.6349	32.2169	29.4844	9.06911	38.0137	4.01128	24.5321
9117	8	GC	FA	14	22.2	3.08	2.94	4.69	0.68376	0.65268	1.04118	18.1	53.6686	124.503	1.23298	254.165	2.65781	0.633941	2.64987	58.8272	0.68376	0.472498	0.554561	0.231453	0.257264	61.9164	27.9073	39.189	96.9869	44.9666	17.6431	48.815	34.2734	10.6574	45.3354	17.7513	31.3491	20.8254	18.7561	32.8773	59.3477	46.4906	14.961	30.8283	28.2135	8.6782	36.3751	3.83838	23.4747
9124	9	GC	FA	14	22	3.31	2.68	4.71	0.7282	0.5896	1.0362	16.7	49.5174	114.872	1.13761	234.506	2.45223	0.623687	2.60701	57.3543	0.7282	0.499286	0.640115	0.244575	0.296954	57.1273	25.7487	36.1578	89.4851	41.4885	16.2785	45.0393	31.6224	9.8331	41.8288	16.3782	28.9243	20.6378	18.5871	32.5811	58.813	46.0717	14.8262	30.5505	27.9594	8.60002	36.0474	3.8038	23.2632
9126	10	GC	FA	14	21.2	3.1	3.25	4.5	0.6572	0.689	0.954	16.35	48.4797	112.465	1.11377	229.591	2.40084	0.656375	2.74365	58.1653	0.6572	0.517186	0.59007	0.253343	0.273738	55.93	25.2091	35.4	87.6097	40.619	15.9373	44.0954	30.9597	9.62701	40.9521	16.035	28.3181	19.8873	17.9112	31.3964	56.6744	44.3964	14.2871	29.4396	26.9427	8.28729	34.7366	3.66548	22.4173
9130	11	GC	FA	14	23.56	3.022	3.409	4.58	0.711983	0.80316	1.07905	18.9	56.0407	130.005	1.28747	265.399	2.77528	0.66986	2.80002	65.9684	0.711983	0.507428	0.553009	0.248563	0.256544	64.6531	29.1408	40.9211	101.274	46.9541	18.4229	50.9726	35.7883	11.1285	47.3391	18.5358	32.7347	22.1012	19.9051	34.8914	62.9834	49.3386	15.8776	32.7168	29.9419	9.20984	38.6035	4.07352	24.9128
1889	7	GC	NO	6	22.4	3.04	3.4	4.42	0.68096	0.7616	0.99008	17.94	53.82	111.675	1.22574	242.609	2.66455	0.66373	2.77439	62.1464	0.68096	0.556495	0.555549	0.256158	0.255563	61.1685	27.7133	38.7839	96.6906	44.2944	17.5825	48.4309	33.9583	10.5091	44.9884	17.6947	31.0826	21.013	18.9251	33.1735	59.8824	46.9094	15.0958	31.106	28.4677	8.75638	36.7028	3.87296	23.6862
2024	3	GC	NO	6	23.4	3.1	3.54	4.52	0.7254	0.82836	1.05768	16.42	49.26	102.213	1.12189	222.054	2.43879	0.684106	2.85956	66.9138	0.7254	0.654652	0.646588	0.301341	0.297442	55.9858	25.3652	35.4979	88.4983	40.5415	16.0928	44.3275	31.0811	9.61869	41.1767	16.1955	28.4491	21.9511	19.77	34.6545	62.5557	49.0036	15.7697	32.4946	29.7386	9.14729	38.3414	4.04586	24.7436
2044	1	GC	NO	6	22.2	3.07	2.6	4.77	0.68154	0.5772	1.05894	15.34	46.02	95.4899	1.0481	207.448	2.27839	0.604945	2.52867	56.1365	0.68154	0.587879	0.650263	0.270604	0.299133	52.3035	23.6969	33.1631	82.6775	37.8749	15.0343	41.4119	29.0368	8.98603	38.4684	15.1303	26.5779	20.8254	18.7561	32.8773	59.3477	46.4906	14.961	30.8283	28.2135	8.6782	36.3751	3.83838	23.4747
4042	6	GC	NO	6	17.6	2.69	2.82	4.43	0.47344	0.49632	0.77968	17	51	105.823	1.16152	229.897	2.52494	0.590293	2.46742	43.4267	0.47344	0.41037	0.407605	0.188896	0.187506	57.9634	26.2612	36.7518	91.6243	41.9735	16.6613	45.8932	32.179	9.95845	42.6312	16.7676	29.454	16.5102	14.8697	26.0649	47.0504	36.8574	11.861	24.4404	22.3675	6.88002	28.838	3.04304	18.6106
9104	2	GC	NO	6	24.2	2.81	2.7	4.83	0.68002	0.6534	1.16886	15.4	46.2	95.8634	1.0522	208.26	2.2873	0.601785	2.51546	60.8742	0.68002	0.63501	0.646285	0.292299	0.297303	52.508	23.7896	33.2928	83.0009	38.023	15.0931	41.5739	29.1504	9.02118	38.6188	15.1895	26.6818	22.7015	20.4459	35.8392	64.6943	50.6789	16.3089	33.6056	30.7553	9.46002	39.6522	4.18418	25.5896
9105	4	GC	NO	6	19	3.21	3.81	4.88	0.6099	0.7239	0.9272	14.83	44.49	92.3152	1.01325	200.552	2.20264	0.729679	3.05006	57.9511	0.6099	0.627753	0.601922	0.288959	0.276895	50.5646	22.909	32.0605	79.9287	36.6157	14.5345	40.0351	28.0715	8.68728	37.1894	14.6273	25.6943	17.8235	16.0525	28.1382	50.7931	39.7892	12.8045	26.3845	24.1467	7.42729	31.1319	3.2851	20.091
9111	5	GC	NO	6	18.4	3	2.73	4.95	0.552	0.50232	0.9108	21.49	64.47	133.773	1.4683	290.617	3.19182	0.620142	2.59219	47.6964	0.552	0.356547	0.375946	0.164121	0.172942	73.2726	33.1973	46.4586	115.824	53.0594	21.0618	58.0145	40.6781	12.5886	53.8908	21.1962	37.2333	17.2607	15.5456	27.2497	49.1891	38.5327	12.4001	25.5513	23.3842	7.19274	30.1488	3.18136	19.4565
9119	10	GC	NO	6	20	3.16	3.3	4.72	0.632	0.66	0.944	17.5	52.5	108.936	1.19568	236.659	2.5992	0.67313	2.81368	56.2737	0.632	0.516577	0.52857	0.237784	0.243152	59.6682	27.0336	37.8327	94.3192	43.208	17.1513	47.243	33.1255	10.2513	43.885	17.2608	30.3203	18.7616	16.8974	29.6192	53.4664	41.8834	13.4784	27.7732	25.4176	7.8182	32.7704	3.458	21.1484
9120	9	GC	NO	6	26	2.92	3.42	4.82	0.7592	0.8892	1.2532	18.78	56.34	116.904	1.28314	253.969	2.78932	0.674548	2.81961	73.3099	0.7592	0.627097	0.591676	0.288657	0.272181	64.0325	29.0109	40.5999	101.218	46.3684	18.4058	50.6985	35.5483	11.0012	47.0949	18.5233	32.538	24.3901	21.9666	38.505	69.5063	54.4484	17.5219	36.1052	33.0429	10.1637	42.6015	4.4954	27.4929
9128	11	GC	NO	6	21.2222	3.11625	3.47125	4.7075	0.661337	0.736676	0.999036	18	54	112.048	1.22984	243.421	2.67347	0.686052	2.8677	60.8589	0.661337	0.543149	0.537742	0.250015	0.247371	61.373	27.806	38.9136	97.014	44.4425	17.6413	48.5928	34.0719	10.5442	45.1389	17.7539	31.1866	19.9081	17.93	31.4293	56.7338	44.4429	14.3021	29.4705	26.9709	8.29598	34.773	3.66932	22.4408
1889	7	GC	NO	14	20.2	3.42	3.45	4.83	0.69084	0.6969	0.97566	21.2	63.6	131.968	1.44848	286.695	3.14875	0.70623	2.95204	59.6312	0.69084	0.451862	0.476941	0.207995	0.219402	72.2838	32.7493	45.8316	114.261	52.3434	20.7776	57.2316	40.1291	12.4188	53.1636	20.9102	36.7308	18.9492	17.0664	29.9154	54.0011	42.3022	13.6132	28.0509	25.6718	7.89638	33.0981	3.49258	21.3599
2024	3	GC	NO	14	23	3.21	3.14	4.73	0.7383	0.7222	1.0879	17.91	53.73	111.488	1.22369	242.204	2.6601	0.661511	2.76512	63.5977	0.7383	0.570445	0.603338	0.262579	0.277546	61.0662	27.667	38.7191	96.5289	44.2203	17.5531	48.3499	33.9015	10.4915	44.9132	17.6652	31.0306	21.5758	19.432	34.0621	61.4864	48.1659	15.5002	31.9392	29.2302	8.99093	37.686	3.9767	24.3207
2044	1	GC	NO	14	23	3.2	3.33	4.78	0.736	0.7659	1.0994	15.34	46.02	95.4899	1.0481	207.448	2.27839	0.680567	2.84477	65.4297	0.736	0.6852	0.702224	0.315402	0.323036	52.3035	23.6969	33.1631	82.6775	37.8749	15.0343	41.4119	29.0368	8.98603	38.4684	15.1303	26.5779	21.5758	19.432	34.0621	61.4864	48.1659	15.5002	31.9392	29.2302	8.99093	37.686	3.9767	24.3207
4042	6	GC	NO	14	15	2.92	3.97	4.4	0.438	0.5955	0.66	17.6	52.8	109.558	1.20251	238.011	2.61405	0.709053	2.96384	44.4576	0.438	0.40579	0.364237	0.186788	0.167556	60.0092	27.1881	38.0489	94.8581	43.4549	17.2493	47.513	33.3147	10.3099	44.1358	17.3594	30.4935	14.0712	12.673	22.2144	40.0998	31.4126	10.1088	20.8299	19.0632	5.86365	24.5778	2.5935	15.8613
9104	2	GC	NO	14	22.4	2.91	3.02	4.7	0.65184	0.67648	1.0528	18.01	54.03	112.11	1.23053	243.556	2.67495	0.632078	2.64209	59.1827	0.65184	0.527897	0.529725	0.242994	0.243683	61.4071	27.8214	38.9353	97.0679	44.4672	17.6511	48.6198	34.0908	10.5501	45.164	17.7638	31.2039	21.013	18.9251	33.1735	59.8824	46.9094	15.0958	31.106	28.4677	8.75638	36.7028	3.87296	23.6862
9105	4	GC	NO	14	22.2	3.28	4.1	4.57	0.72816	0.9102	1.01454	17.4	52.2	108.313	1.18885	235.307	2.58435	0.748365	3.12817	69.4453	0.72816	0.641153	0.612492	0.295127	0.281758	59.3273	26.8791	37.6165	93.7802	42.9611	17.0533	46.9731	32.9362	10.1928	43.6343	17.1621	30.147	20.8254	18.7561	32.8773	59.3477	46.4906	14.961	30.8283	28.2135	8.6782	36.3751	3.83838	23.4747
9111	5	GC	NO	14	19.8	2.59	3.36	4.93	0.51282	0.66528	0.97614	17.07	51.21	106.259	1.1663	230.844	2.53534	0.654509	2.73585	54.1698	0.51282	0.50979	0.439698	0.23466	0.202269	58.2021	26.3693	36.9031	92.0016	42.1463	16.7299	46.0822	32.3115	9.99945	42.8067	16.8366	29.5753	18.574	16.7284	29.323	52.9317	41.4646	13.3436	27.4955	25.1634	7.74002	32.4427	3.42342	20.9369
9119	10	GC	NO	14	20.2	3	3	4.9	0.606	0.606	0.9898	17.2	51.6	107.068	1.17518	232.602	2.55464	0.64325	2.68878	54.3135	0.606	0.507279	0.515665	0.233504	0.237215	58.6453	26.5702	37.1841	92.7023	42.4673	16.8573	46.4332	32.5576	10.0756	43.1327	16.9649	29.8005	18.9492	17.0664	29.9154	54.0011	42.3022	13.6132	28.0509	25.6718	7.89638	33.0981	3.49258	21.3599
9120	9	GC	NO	14	25.2	3.4	3.4	4.72	0.8568	0.8568	1.18944	17.55	52.65	109.247	1.1991	237.335	2.60663	0.6961	2.9097	73.3244	0.8568	0.67118	0.714538	0.308949	0.3287	59.8387	27.1108	37.9408	94.5886	43.3315	17.2003	47.378	33.2201	10.2806	44.0104	17.3101	30.4069	23.6396	21.2907	37.3202	67.3677	52.7731	16.9828	34.9942	32.0262	9.85093	41.2907	4.35708	26.647
9128	11	GC	NO	14	21.4667	3	3.14667	4.70444	0.644	0.675484	1.00989	17.56	52.68	109.309	1.19978	237.47	2.60811	0.649151	2.71345	58.2487	0.644	0.532881	0.536765	0.245289	0.246922	59.8728	27.1263	37.9624	94.6425	43.3561	17.2101	47.405	33.239	10.2865	44.0355	17.3199	30.4242	20.1375	18.1365	31.7913	57.3873	44.9548	14.4668	29.8099	27.2816	8.39153	35.1736	3.71159	22.6993
[truncated: 12 more columns]

## Sheet: Exp 2 VFA
Cow	Period	Time	Corn_method	FA_Sup	Acetate	Propionate	Isobutyrate	Butyrate	Isovalerate	Valerate	Total VFA	A/P	N-NH3
1306	1	0	SF	FA	78.438	26.94	1.39	25.25	1.9	1.33	135.248	2.91158	19.45
1306	1	1	SF	FA	74.616	31.05	1.64	21.97	2.53	1.99	133.796	2.40309	15.6
1306	1	2	SF	FA	75.33	34.61	2.57	16.75	2.56	1.55	133.37	2.17654	15.8
1306	1	4	SF	FA	59.4	23.61	1.22	22.01	1.63	1.21	109.08	2.51588	18.7
1306	1	6	SF	FA	43.14	16.78	1.27	13.83	1.74	1.02	77.78	2.57092	10.404
1306	1	8	SF	FA	43.674	17.58	8.31	14.96	1.24	9.73	95.494	2.4843	20.89
1306	1	12	SF	FA	66.318	31.06	1.59	15.26	2.57	1.41	118.208	2.13516	9.87
1306	1	24	SF	FA	60.36	30.03	1.29	14.62	2.1	1.25	109.65	2.00999	22.12
1934	2	0	SF	FA	66.318	31.06	1.59	15.26	2.57	1.41	118.208	2.13516	25
1934	2	1	SF	FA	47.364	17.26	1.45	13.74	1.96	1.05	82.824	2.74415	21.65
1934	2	2	SF	FA	53.73	27.67	1.3	15.17	2.21	1.27	101.35	1.94181	22.12
1934	2	4	SF	FA	57.702	22.23	1.48	17.42	2	1.2	102.032	2.59568	16.65
1934	2	6	SF	FA	52.902	28.26	1.38	15.85	2.17	1.34	101.902	1.87197	9.325
1934	2	8	SF	FA	54.402	29.6	1.42	16.53	2.22	1.36	105.532	1.83791	16.55
1934	2	12	SF	FA	55.518	20.83	1.35	16.41	1.93	1.96	97.998	2.66529	9.895
1934	2	24	SF	FA	65.344	21.01	0.97	15.31	1.58	1.22	89.686	3.11014	15.8
1615	3	0	SF	FA	41.142	13.18	1.17	9.53	1.55	6.72	73.292	3.12155	16.34
1615	3	1	SF	FA	71.7	30.16	1.74	18.3	2.4	1.39	125.69	2.37732	19.45
1615	3	2	SF	FA	70.176	31.14	1.86	20.01	2.71	1.57	127.466	2.25356	23.3
1615	3	4	SF	FA	53.73	27.67	1.3	15.17	2.21	1.27	101.35	1.94181	12.7
1615	3	6	SF	FA	55.944	27.4	1.41	17.05	1.97	1.22	104.994	2.04175	8.88
1615	3	8	SF	FA	57.345	18.26	9.06	14.52	1.46	1.03	83.096	3.14047	16.34
1615	3	12	SF	FA	55.044	28.03	1.34	15.49	2.13	1.25	103.284	1.96375	8.86
1615	3	24	SF	FA	61.494	24.09	1.5	17.11	1.92	1.01	103.634	2.55268	18.15
1496	4	0	SF	FA	61.966	23.7267	1.38333	16.68	2.00667	3.15333	108.916	2.61166	17
1496	4	1	SF	FA	64.56	26.1567	1.61	18.0033	2.29667	1.47667	114.103	2.4682	18.63
1496	4	2	SF	FA	66.412	31.14	1.91	17.31	2.49333	1.46333	120.729	2.13269	13.89
1496	4	4	SF	FA	56.944	24.5033	1.33333	18.2	1.94667	1.22667	104.154	2.32393	17.54
1496	4	6	SF	FA	50.662	24.1467	1.35333	15.5767	1.96	1.19333	94.892	2.09809	9.54
1496	4	8	SF	FA	45.614	21.8133	6.26333	15.3367	1.64	4.04	94.7073	2.09111	17.93
1496	4	12	SF	FA	58.96	26.64	1.42667	15.72	2.21	1.54	106.497	2.21321	8.04
1496	4	24	SF	FA	57.15	23.88	1.25333	15.68	1.86667	1.16	100.99	2.39322	19.65
1934	1	0	SF	NO	37.404	20.08	1.07	11.61	1.99	1.1	73.254	1.86275	16.75
1934	1	1	SF	NO	51.438	24.8	1.35	15.57	1.9	1.22	96.278	2.07411	12.09
1934	1	2	SF	NO	70.176	31.14	1.86	20.01	2.71	1.57	127.466	2.25356	14.8
1934	1	4	SF	NO	74.616	31.05	1.64	21.97	2.53	1.99	133.796	2.40309	12.89
1934	1	6	SF	NO	78.438	26.94	1.39	25.25	1.9	1.33	135.248	2.91158	10.87
1934	1	8	SF	NO	59.22	24.77	1.4	15.56	2.16	1.25	104.36	2.3908	8.299
1934	1	12	SF	NO	66.924	29.93	1.7	16.25	2.57	1.5	118.874	2.23602	12.505
1934	1	24	SF	NO	60.102	26.9	1.64	15.43	2.33	1.29	107.692	2.23428	13.05
1496	2	0	SF	NO	54.996	25.99	1.4	15.79	1.84	1.15	101.166	2.11604	19.05
1496	2	1	SF	NO	76.89	25.86	1.94	17.6	2.45	1.27	126.01	2.97332	14.35
1496	2	2	SF	NO	77.04	29.82	1.84	19.45	2.77	1.76	132.68	2.5835	18.35
1496	2	4	SF	NO	76.362	28.97	1.75	17.34	2.56	1.27	128.252	2.6359	17.9
1496	2	6	SF	NO	57.702	22.23	1.48	17.42	2	1.2	102.032	2.59568	12.8
1496	2	8	SF	NO	69.156	23.48	1.34	23.96	1.8	1.12	120.856	2.94532	10.4
1496	2	12	SF	NO	62.256	22.03	1.32	17.07	1.8	1.24	105.716	2.82596	13.6
1496	2	24	SF	NO	66.5127	27.39	1.48556	16.8544	2.07444	1.90222	114.725	2.42836	18.2
1306	3	0	SF	NO	71.766	27.47	1.32	18.28	1.98	1.33	122.146	2.61252	20.15
1306	3	1	SF	NO	53.694	26.73	1.45	13.59	2.17	1.22	98.854	2.00875	10.325
1306	3	2	SF	NO	67.74	29.63	1.66	20.59	2.6	1.9	124.12	2.2862	16.35
1306	3	4	SF	NO	50.376	18.99	1.34	16.19	1.85	1.16	89.906	2.65276	13.7
1306	3	6	SF	NO	77.04	29.82	1.84	19.45	2.77	1.77	132.69	2.5835	12
1306	3	8	SF	NO	51.444	24.8	1.35	15.57	1.9	1.22	96.284	2.07435	12.8
1306	3	12	SF	NO	54.402	29.6	1.42	16.53	2.22	1.36	105.532	1.83791	15.8
1306	3	24	SF	NO	79.266	28.07	1.41	20.11	1.95	1.31	132.116	2.82387	20.9
1615	4	0	SF	NO	54.722	24.5133	1.26333	15.2267	1.93667	1.19333	98.8553	2.23234	18.65
1615	4	1	SF	NO	60.674	25.7967	1.58	15.5867	2.17333	1.23667	107.047	2.35201	11.5
1615	4	2	SF	NO	71.652	30.1967	1.78667	20.0167	2.69333	1.74333	128.089	2.37284	16.5
1615	4	4	SF	NO	67.118	26.3367	1.57667	18.5	2.31333	1.47333	117.318	2.54846	14.85
1615	4	6	SF	NO	71.06	26.33	1.57	20.7067	2.22333	1.43333	123.323	2.69882	10.3
1615	4	8	SF	NO	59.94	24.35	1.36333	18.3633	1.95333	1.19667	107.167	2.4616	10.5
1615	4	12	SF	NO	61.194	27.1867	1.48	16.6167	2.19667	1.36667	110.041	2.25088	14.75
1615	4	24	SF	NO	60.17	27.2	1.40667	15.0233	1.94333	3.10667	104.367	2.21213	17.38
1615	1	0	GC	FA	56.796	21.06	1.59	15.9	2.1	1.27	98.716	2.69687	19.5
1615	1	1	GC	FA	57.282	23.47	1.35	18.71	1.68	1.25	103.742	2.44065	23
1615	1	2	GC	FA	59.22	24.77	1.4	15.56	2.16	1.25	104.36	2.3908	16.05
1615	1	4	GC	FA	61.638	24.87	1.37	19.4	1.75	1.33	110.358	2.47841	20.35
1615	1	6	GC	FA	59.4	23.61	1.22	22.01	1.63	1.21	109.08	2.51588	16.2
1615	1	8	GC	FA	55.518	20.82	1.35	16.41	1.93	1.2	97.228	2.66657	19.2
1615	1	12	GC	FA	37.41	20.08	1.06	11.61	1.99	1.1	73.25	1.86305	10.145
1615	1	24	GC	FA	61.638	21.761	1.37	19.4	1.75	1.33	110.358	2.8325	17.07
1306	2	0	GC	FA	49.596	21.01	9.7	15.31	1.58	1.22	98.416	2.36059	18.87
1306	2	1	GC	FA	65.772	26.54	1.38	17.63	2.19	1.5	115.012	2.47822	21.6
1306	2	2	GC	FA	58	23	1.44	13.74	1.96	1.06	82.834	2.52174	14.25
1306	2	4	GC	FA	49.596	21.01	9.7	15.31	1.58	1.22	98.416	2.36059	17.9
1306	2	6	GC	FA	62.256	22.03	1.31	17.07	1.8	1.24	105.706	2.82596	17.23
1306	2	8	GC	FA	52.326	20.67	1.03	15.74	1.49	1.04	92.296	2.53149	21.6
1306	2	12	GC	FA	54.996	25.98	1.4	15.79	1.84	1.15	101.156	2.11686	15.53
1306	2	24	GC	FA	50.376	20.21	1.29	13.99	1.78	1.06	88.706	2.49263	14.87
1496	3	0	GC	FA	49	18	9.36	11.05	1.37	7.23	79.87	2.72222	16.75
1496	3	1	GC	FA	54	18	1.27	13.83	1.74	1.02	77.78	3	26.1
1496	3	2	GC	FA	43.932	20.95	1.04	10.66	1.8	1.03	79.412	2.09699	17.7
1496	3	4	GC	FA	54.37	19.21	1.35	15.24	1.77	1.06	93	2.8303	24.435
1496	3	6	GC	FA	50	24	1.04	10.66	1.8	1.02	79.402	2.08333	14.7
1496	3	8	GC	FA	58	23	9.89	12.41	1.42	1,08	88.402	2.52174	18.6
1496	3	12	GC	FA	61.62	21.83	1.31	16.32	1.76	1.24	104.08	2.82272	14.4
1496	3	24	GC	FA	59.98	22.234	1.35	16	1.86	1.12	97.987	2.69767	11.6
1934	4	0	GC	FA	47.384	19.0567	6.88333	14.0867	1.68333	3.24	92.334	2.48648	15.39
1934	4	1	GC	FA	55.398	22.2633	1.33333	16.7233	1.87	1.25667	98.8447	2.48831	21.33
1934	4	2	GC	FA	50.172	20.9967	1.29333	13.32	1.97333	1.11333	88.8687	2.38952	16.2
1934	4	4	GC	FA	55.2013	21.6967	4.14	16.65	1.7	1.20333	100.591	2.54423	20.9
1934	4	6	GC	FA	55.196	22.1967	1.19	16.58	1.74333	1.15667	98.0627	2.48668	13.93
1934	4	8	GC	FA	50.852	20.4867	4.09	14.8533	1.61333	1.12	92.642	2.4822	19.8
1934	4	12	GC	FA	51.342	22.63	1.25667	14.5733	1.86333	1.16333	92.8287	2.26876	15.57
1934	4	24	GC	FA	54.098	21.13	1.31667	15.9	1.79667	1.15333	95.3947	2.56025	17.93
1496	1	0	GC	NO	77.898	35.24	1.61	16.75	2.65	1.58	135.728	2.2105	20.7
1496	1	1	GC	NO	69.156	23.48	1.34	23.96	1.8	1.13	120.866	2.94532	19.87
1496	1	2	GC	NO	50.28	18.31	1.29	14.31	1.86	1.07	87.12	2.74604	16.73
1496	1	4	GC	NO	66.924	29.93	1.7	16.25	2.57	1.5	118.874	2.23602	13.6
1496	1	6	GC	NO	38.766	18.26	9.06	14.52	1.46	1.03	83.096	2.123	16.4
1496	1	8	GC	NO	45	15.1	9.37	11.05	1.37	7.23	80.12	2.98013	11.66
1496	1	12	GC	NO	62	21.34	8.31	16.56	1.56	9.73	100	2.90534	10.9
1496	1	24	GC	NO	61.542	24.7	1.09	15.89	1.52	1.05	105.792	2.49158	12.6
1615	2	0	GC	NO	61.5	20.6	1.5	17.11	1.92	1.01	103.64	2.98544	14.1
1615	2	1	GC	NO	65.994	23.03	1.3	19.4	1.68	1.2	112.604	2.86557	10.405
1615	2	2	GC	NO	56.796	21.06	1.59	15.9	2.1	1.27	98.716	2.69687	17.65
1615	2	4	GC	NO	61	24	9.06	14.52	1.52	1.46	83.586	2.54167	17.89
1615	2	6	GC	NO	65.346	25.37	1.24	17.38	1.65	1.37	112.356	2.57572	13.5
1615	2	8	GC	NO	65.346	25.37	1.24	17.38	1.65	1.37	112.356	2.57572	15.78
1615	2	12	GC	NO	76.2	31.6	1.4	22.42	1.94	1.5	135.06	2.41139	7.77
1615	2	24	GC	NO	52.326	20.67	1.04	15.74	1.5	1.04	92.316	2.53149	10.235
1934	3	0	GC	NO	57.15	19.23	1.17	19.33	1.59	1.1	99.57	2.97192	18.04
1934	3	1	GC	NO	53.694	26.73	1.45	13.59	2.17	1.21	98.844	2.00875	15.08
1934	3	2	GC	NO	77.898	35.24	1.61	16.75	2.65	1.58	135.728	2.2105	20.15
1934	3	4	GC	NO	50.376	18.99	.	16.19	1.85	1.16	.	2.65276	18.45
1934	3	6	GC	NO	52.902	28.26	1.38	15.85	2.17	1.34	101.902	1.87197	19.67
1934	3	8	GC	NO	59.82	25.48	1.37	23.67	1.89	1.35	113.58	2.34772	12.4
1934	3	12	GC	NO	44.712	19.87	9.89	12.4	1.42	1.08	96.2	2.25023	9.87
1934	3	24	GC	NO	54.372	19.21	1.36	15.25	1.77	1.07	93.032	2.8304	19.55
1306	4	0	GC	NO	65.516	25.0233	1.42667	17.73	2.05333	1.23	112.979	2.6182	18.01
1306	4	1	GC	NO	62.948	24.4133	1.36333	18.9833	1.88333	1.18	110.771	2.57843	17.61
1306	4	2	GC	NO	61.658	24.87	1.49667	15.6533	2.20333	1.30667	107.188	2.47921	16.33
1306	4	4	GC	NO	52.022	22.3933	.	15.6533	1.98	1.37333	.	2.3231	15.8
1306	4	6	GC	NO	52.338	23.9633	3.89333	15.9167	1.76	1.24667	99.118	2.18409	18.53
1306	4	8	GC	NO	53.722	21.9833	3.99333	17.3667	1.63667	3.31667	102.019	2.44376	14.6
1306	4	12	GC	NO	54.864	23.0167	6.53333	16.5967	1.53333	39.7433	142.287	2.38366	10.2
1306	4	24	GC	NO	56.08	21.5267	1.16333	15.6267	1.59667	1.05333	97.0467	2.60514	13.2

[truncated: 2 more sheets: Exp 2, Performance, Exp 2, Methane estimation]
